# Supplementary material for: Comparative Transcriptomic Assessment of Chemosensory Genes in Adult and Larval Olfactory Organs of Cnaphalocrocis medinalis
Source: MDPI journal article supplement (doi:10.3390/genes14122165), 2023-11-30
Supplement: s1 [file s1]

## Supplementary Materials

**Table S1.** Oligonucleotide primers used for expression validation analysis.

| Gene name      | Forward primer sequence | Reverse primer sequence  |
|----------------|-------------------------|--------------------------|
| $\beta$ -Actin | CGAGCGTGGTTACTCATTCA    | ATGACTTCTCGAGCGAGCTG     |
| CmedGOBP1      | CGACAGAGTTCATAGTGGCTC   | ACATCAAGCAGTGGTCTTCG     |
| CmedGOBP2      | GCCATGTAACAGCTCACTTTG   | AGTCCTCGTTCCAGAAATGC     |
| CmedPBP2       | TGGAGCAGATGACGAAACG     | TTGAGCTTGTGTATCTCGTCTC   |
| CmedPBP5       | TGGAGCAGATGACGAAACG     | TTGAGCTTGTGTATCTCGTCTC   |
| CmedOBP15      | GGAATGTTTGGGCATAATGGG   | AAACACGCAAGGAAACAAGG     |
| CmedOBP20      | GCGTTGGTAAACAAGCTCAG    | AGCACTTCACGTAGTTCCAAG    |
| CmedOBP26      | TGCGTCTTCAAGAGTACCAAG   | TGCTGTCTTCAATCGCTACG     |
| CmedCSP2       | ATGACAACCTGAACCTCCAAG   | AGTGCTCTTTCAACTCCTTTCC   |
| CmedCSP4       | ATGACAACCTGAACCTCCAAG   | AGTGCTCTTTCAACTCCTTTCC   |
| CmedCSP7       | TCGCAACAGCCTTAGTTCTC    | TCATTCTTGTCCAGGAAGCAG    |
| CmedCSP11      | TGACATTAACGAGGTGCTGG    | GGCGCACTGAGTTTCTAGAG     |
| CmedCSP15      | CAGCACCAAATACGACAACCTTC | AGAAGCAGTTGATGTACGCC     |
| CmedCSP18      | CAGCACCAAATACGACAACCTTC | AGAAGCAGTTGATGTACGCC     |
| CmedCSP21      | GCTCTGACAAGTACACCGAC    | GATCTAAGTTCCTTGCCCTCAG   |
| CmedCSP33      | AGTTGCCGACACGTACAAG     | GCAGCGACTTCATTACAAGC     |
| CmedCSP37      | GCCAACACTGCACATCAATG    | CCAAGACGAACGCTGTAAAAG    |
| CmedPR1        | GACCACTTCTACTTCACGAGC   | GTCTTCACCAGGACCTTGATG    |
| CmedOR10       | CCCTGCCCTTTGACTACATG    | TAGGAGATGTAGCAGTTGAATGAG |
| CmedOR27       | CCCTGCCCTTTGACTACATG    | TAGGAGATGTAGCAGTTGAATGAG |
| CmedOR39       | ATATCTGACGCATGTTGGGAG   | GAGACCTCTTCAAATCCTGGG    |
| CmedOR40       | ATATCTGACGCATGTTGGGAG   | GAGACCTCTTCAAATCCTGGG    |

**Table S2.** List of candidate odorant binding proteins in *C. medinalis*.

| Gene name   | Length (bp) | ORF (aa) | Accession number  | Status       | Signal peptide | BLASTX best hit (Acc. no./Gene name/species)                                               | E-value | Identity(%) |
|-------------|-------------|----------|-------------------|--------------|----------------|--------------------------------------------------------------------------------------------|---------|-------------|
| CmedGOBP1   | 492         | 163      | AFG72996          | complete ORF | 19             | gb AFG72996.1  general odorant binding protein 1 [ <i>Cnaphalocrocis medinalis</i> ]       | 2e-103  | 100         |
| CmedGOBP2   | 486         | 161      | AFG72997          | complete ORF | 20             | gb AFG72997.1  general odorant binding protein 2 [ <i>Cnaphalocrocis medinalis</i> ]       | 8e-116  | 100         |
| CmedGOBP2.1 | 420         | 139      | AGI37366          | complete ORF | 18             | gb AGI37366.1  general odorant-binding protein 2 [ <i>Cnaphalocrocis medinalis</i> ]       | 4e-83   | 100         |
| CmedGOBP3   | 423         | 140      | AGI37362          | complete ORF | 18             | gb AGI37362.1  general odorant-binding protein 3 [ <i>Cnaphalocrocis medinalis</i> ]       | 5e-98   | 99          |
| CmedPBP1    | 483         | 160      | AFG72999          | complete ORF | 18             | gb AFG72999.1  pheromone-binding protein 1 [ <i>Cnaphalocrocis medinalis</i> ]             | 3e-111  | 98          |
| CmedPBP2    | 495         | 164      | AGI37364          | complete ORF | 21             | gb AGI37364.1  pheromone binding protein 2 [ <i>Cnaphalocrocis medinalis</i> ]             | 4e-102  | 100         |
| CmedPBP3    | 549         | 182      | AGI37367          | complete ORF | 22             | gb AGI37367.1  pheromone binding protein 3 [ <i>Cnaphalocrocis medinalis</i> ]             | 2e-127  | 98          |
| CmedPBP4    | 495         | 164      | AGI37368          | complete ORF | 21             | gb AGI37368.1  pheromone binding protein 4 [ <i>Cnaphalocrocis medinalis</i> ]             | 3e-95   | 99          |
| CmedPBP5    | 510         | 169      | ALT31680          | complete ORF | 26             | gb ALT31680.1  pheromone binding protein 5 [ <i>Cnaphalocrocis medinalis</i> ]             | 4e-111  | 99          |
| CmedOBP1    | 444         | 147      | AFG72998          | complete ORF | 26             | gb AFG72998.1  odorant-binding protein 1 [ <i>Cnaphalocrocis medinalis</i> ]               | 1e-101  | 96          |
| CmedOBP2    | 420         | 139      | AFG73000          | complete ORF | 18             | gb AFG73000.1  odorant-binding protein 2 [ <i>Cnaphalocrocis medinalis</i> ]               | 9e-96   | 99          |
| CmedOBP6    | 468         | 155      | ALT31636          | complete ORF | NO             | gb ALT31636.1  odorant-binding protein 6 [ <i>Cnaphalocrocis medinalis</i> ]               | 7e-155  | 99          |
| CmedOBP9    | 636         | 211      | ALT31639          | complete ORF | NO             | gb ALT31639.1  odorant-binding protein 9 [ <i>Cnaphalocrocis medinalis</i> ]               | 7e-150  | 100         |
| CmedOBP11   | 513         | 170      | ALT31641          | complete ORF | 15             | gb ALT31641.1  odorant-binding protein 11 [ <i>Cnaphalocrocis medinalis</i> ]              | 3e-121  | 100         |
| CmedOBP12   | 363         | 120      | ALT31642          | complete ORF | NO             | gb ALT31642.1  odorant-binding protein 12 [ <i>Cnaphalocrocis medinalis</i> ]              | 1e-80   | 99          |
| CmedOBP13   | 453         | 150      | ALT31643          | complete ORF | 22             | gb ALT31643.1  odorant-binding protein 13 [ <i>Cnaphalocrocis medinalis</i> ]              | 4e-109  | 100         |
| CmedOBP15   | 447         | 148      | ALT31645          | complete ORF | 20             | gb ALT31645.1  odorant-binding protein 15 [ <i>Cnaphalocrocis medinalis</i> ]              | 5e-103  | 100         |
| CmedOBP17   | 423         | 140      | ALT31647          | complete ORF | 16             | gb ALT31647.1  odorant-binding protein 17 [ <i>Cnaphalocrocis medinalis</i> ]              | 2e-68   | 100         |
| CmedOBP18   | 414         | 137      | ALT31648          | complete ORF | 18             | gb ALT31648.1  odorant-binding protein 18 [ <i>Cnaphalocrocis medinalis</i> ]              | 5e-84   | 100         |
| CmedOBP19   | 444         | 147      | ALT31649          | 3' missing   | 20             | gb ALT31649.1  odorant-binding protein 19 [ <i>Cnaphalocrocis medinalis</i> ]              | 2e-76   | 100         |
| CmedOBP20   | 402         | 133      | ALT31650          | complete ORF | 16             | gb ALT31650.1  odorant-binding protein 20 [ <i>Cnaphalocrocis medinalis</i> ]              | 4e-92   | 99          |
| CmedOBP21   | 435         | 144      | ALT31651          | complete ORF | 16             | gb ALT31651.1  odorant-binding protein 21 [ <i>Cnaphalocrocis medinalis</i> ]              | 2e-75   | 100         |
| CmedOBP26   | 465         | 154      | APY22693          | complete ORF | 22             | gb APY22693.1  odorant binding protein 26 [ <i>Cnaphalocrocis medinalis</i> ]              | 7e-107  | 100         |
|             |             |          |                   |              |                | gb XP_028178754.1  general odorant-binding protein 19a-like [ <i>Ostrinia furnacalis</i> ] |         |             |
| CmedOBP27   | 423         | 140      | APY22694          | complete ORF | 19             |                                                                                            | 8e-62   | 71          |
| CmedOBP28*  | 450         | 149      | novel.2164        | complete ORF | 21             | gb APG32538.1  odorant binding preotein [ <i>Conogethes punctiferalis</i> ]                | 9e-57   | 68          |
| CmedOBP29*  | 459         | 152      | novel.2165        | complete ORF | 19             | gb  UVB79204.1   odorant-binding protein 14 [ <i>Heortia vitessoides</i> ]                 | 6e-59   | 64          |
|             |             |          |                   |              |                | gb  XP_028034646.1  uncharacterized protein LOC114246361 [ <i>Bombyx mandarina</i> ]       |         |             |
| CmedOBP30*  | 462         | 153      | novel.3604        | complete ORF | 25             |                                                                                            | 1e-44   | 59          |
| CmedOBP31*  | 459         | 152      | evm.TU.000022F.10 | complete ORF | NO             | gb  ALC76544.1  odorant binding protein 4 [ <i>Conogethes punctiferalis</i> ]              | 7e-87   | 86          |

|            |     |     |                   |              |    |                                                                                     |        |    |
|------------|-----|-----|-------------------|--------------|----|-------------------------------------------------------------------------------------|--------|----|
| CmedOBP32* | 513 | 170 | evm.TU.000084F.49 | complete ORF | 22 | gb RVE52919.1 hypothetical protein evm_002396 [ <i>Chilo suppressalis</i> ]         | 9e-07  | 32 |
| CmedOBP33* | 495 | 164 | evm.TU.000000F.66 | complete ORF | 24 | gb APG32531.1 odorant binding preotein [ <i>Conogethes punctiferalis</i> ]          | 2e-100 | 87 |
| CmedOBP34* | 432 | 143 | evm.TU.000322F.8  | complete ORF | 17 | gb AFG72996.1 general odorant binding protein 1 [ <i>Cnaphalocrocis medinalis</i> ] | 6e-61  | 62 |
| CmedOBP35* | 426 | 141 | evm.TU.000490F.23 | complete ORF | 17 | gb AFG72997.1 general odorant binding protein 2 [ <i>Cnaphalocrocis medinalis</i> ] | 1e-61  | 64 |

**Note:** The newly identified CmedOBPs are marked with \*.

**Table S3.** List of candidate chemosensory proteins in *C. medinalis*.

| Gene name  | Length (bp) | ORF (aa) | Accession number   | Status       | Signal peptide | BLASTX best hit (Acc. no./Gene name/species)                              | E-value | Identity(%) |
|------------|-------------|----------|--------------------|--------------|----------------|---------------------------------------------------------------------------|---------|-------------|
| CmedCSP1   | 330         | 109      | AGI37361           | complete ORF | 18             | gb AGI37361.1 chemosensory protein 1 [ <i>Cnaphalocrocis medinalis</i> ]  | 3e-72   | 99          |
| CmedCSP2   | 396         | 131      | AGI37363           | complete ORF | 23             | gb AGI37363.1 chemosensory protein 2 [ <i>Cnaphalocrocis medinalis</i> ]  | 2e-75   | 100         |
| CmedCSP3   | 372         | 123      | AGI37365           | complete ORF | 17             | gb AGI37365.1 chemosensory protein 3 [ <i>Cnaphalocrocis medinalis</i> ]  | 2e-70   | 100         |
| CmedCSP4   | 396         | 131      | AIX97823           | complete ORF | 18             | gb AIX97823.1 chemosensory protein [ <i>Cnaphalocrocis medinalis</i> ]    | 4e-80   | 99          |
| CmedCSP5   | 378         | 125      | AIX97824           | complete ORF | 18             | gb AIX97824.1 chemosensory protein [ <i>Cnaphalocrocis medinalis</i> ]    | 1e-70   | 99          |
| CmedCSP6   | 390         | 129      | AIX97825           | complete ORF | 18             | gb AIX97825.1 chemosensory protein [ <i>Cnaphalocrocis medinalis</i> ]    | 2e-82   | 100         |
| CmedCSP7   | 372         | 123      | AIX97826           | complete ORF | 19             | gb AIX97826.1 chemosensory protein [ <i>Cnaphalocrocis medinalis</i> ]    | 2e-69   | 99          |
| CmedCSP9   | 201         | 66       | AIX97828           | 3' missing   | 16             | gb AIX97828.1 chemosensory protein [ <i>Cnaphalocrocis medinalis</i> ]    | 2e-30   | 100         |
| CmedCSP10  | 366         | 121      | AIX97829           | complete ORF | 17             | gb AIX97829.1 chemosensory protein [ <i>Cnaphalocrocis medinalis</i> ]    | 1e-75   | 100         |
| CmedCSP11  | 399         | 132      | AIX97830           | complete ORF | 25             | gb QIJ45722.1 chemosensory protein [ <i>Glyphodes pyloalis</i> ]          | 7e-63   | 72          |
| CmedCSP12  | 309         | 102      | AIX97831           | complete ORF | 18             | gb AIX97831.1 chemosensory protein [ <i>Cnaphalocrocis medinalis</i> ]    | 2e-70   | 100         |
| CmedCSP13  | 363         | 120      | AIX97832           | complete ORF | 16             | gb AIX97832.1 chemosensory protein [ <i>Cnaphalocrocis medinalis</i> ]    | 4e-68   | 100         |
| CmedCSP14  | 327         | 108      | AIX97833           | complete ORF | 18             | gb AIX97833.1 chemosensory protein [ <i>Cnaphalocrocis medinalis</i> ]    | 3e-59   | 100         |
| CmedCSP15  | 381         | 126      | AIX97834           | complete ORF | 18             | gb AIX97834.1 chemosensory protein [ <i>Cnaphalocrocis medinalis</i> ]    | 6e-75   | 100         |
| CmedCSP16  | 435         | 144      | AIX97835           | complete ORF | 18             | gb AIX97835.1 chemosensory protein [ <i>Cnaphalocrocis medinalis</i> ]    | 3e-76   | 100         |
| CmedCSP17  | 474         | 157      | AIX97836           | complete ORF | 18             | gb AIX97836.1 chemosensory protein [ <i>Cnaphalocrocis medinalis</i> ]    | 1e-75   | 100         |
| CmedCSP18  | 363         | 120      | AIX97837           | complete ORF | 15             | gb AIX97837.1 chemosensory protein [ <i>Cnaphalocrocis medinalis</i> ]    | 6e-83   | 100         |
| CmedCSP19  | 354         | 117      | AIX97838           | complete ORF | 16             | gb AIX97838.1 chemosensory protein [ <i>Cnaphalocrocis medinalis</i> ]    | 2e-80   | 100         |
| CmedCSP21  | 387         | 128      | AIX97840           | complete ORF | 18             | gb AIX97840.1 chemosensory protein [ <i>Cnaphalocrocis medinalis</i> ]    | 9e-81   | 100         |
| CmedCSP33  | 363         | 120      | ALT31615           | complete ORF | 16             | gb ALT31615.1 chemosensory protein 33 [ <i>Cnaphalocrocis medinalis</i> ] | 1e-70   | 99          |
| CmedCSP36  | 366         | 121      | APY22695           | complete ORF | 18             | gb APY22695.1 chemosensory protein 36 [ <i>Cnaphalocrocis medinalis</i> ] | 2e-83   | 99          |
| CmedCSP37* | 369         | 122      | evm.TU.000005F.100 | complete ORF | 18             | gb APY22695.1 chemosensory protein 36 [ <i>Cnaphalocrocis medinalis</i> ] | 3e-53   | 73          |
| CmedCSP38* | 462         | 153      | evm.TU.000005F.84  | complete ORF | 17             | gb BAV56818.1 chemosensory protein 14 [ <i>Ostrinia furnacalis</i> ]      | 6e-71   | 67          |

**Note:** The newly identified CmedCSPs are marked with \*.

**Table S4.** List of candidate odorant receptors in *C. medinalis*.

| Gene name | Length (bp) | ORF (aa) | Accession number | Status       | TMD | BLASTX best hit (Acc. no./Gene name/species)                                   | E-value | Identity(%) |
|-----------|-------------|----------|------------------|--------------|-----|--------------------------------------------------------------------------------|---------|-------------|
| CmedOrco  | 1422        | 473      | ALT31679         | complete ORF | 7   | gb ALT31679.1 odorant receptor co-receptor [ <i>Cnaphalocrocis medinalis</i> ] | 0.0     | 100         |
| CmedPR1   | 1128        | 375      | ALT31681         | complete ORF | 5   | gb ALT31681.1 pheromone receptor 1 [ <i>Cnaphalocrocis medinalis</i> ]         | 0.0     | 98          |
| CmedOR1   | 1389        | 462      | ALT31655         | complete ORF | 6   | gb ALT31655.1 odorant receptor 1 [ <i>Cnaphalocrocis medinalis</i> ]           | 0.0     | 100         |
| CmedOR2   | 1224        | 407      | ALT31656         | complete ORF | 7   | gb ALT31656.1 odorant receptor 2 [ <i>Cnaphalocrocis medinalis</i> ]           | 0.0     | 100         |
| CmedOR3   | 1296        | 431      | ALT31657         | complete ORF | 6   | gb QEE82767.1 odorant receptor 49 [ <i>Conogethes pinicolicis</i> ]            | 0.0     | 79          |
| CmedOR4   | 1800        | 599      | ALT31658         | complete ORF | 7   | gb BAR43451.1 putative olfactory receptor 9 [ <i>Ostrinia furnacalis</i> ]     | 3e-158  | 72          |
| CmedOR5   | 1206        | 401      | ALT31659         | complete ORF | 7   | gb QIJ45811.1 olfactory receptor [ <i>Glyphodes pyloalis</i> ]                 | 0.0     | 61          |
| CmedOR6   | 795         | 264      | ALT31660         | complete ORF | 4   | gb ALT31660.1 odorant receptor 6 [ <i>Cnaphalocrocis medinalis</i> ]           | 5e-88   | 93          |
| CmedOR7   | 1296        | 431      | ALT31661         | complete ORF | 6   | gb QEE82767.1 odorant receptor 49 [ <i>Conogethes pinicolicis</i> ]            | 0.0     | 75          |
| CmedOR8   | 1170        | 389      | ALT31662         | complete ORF | 7   | gb ALT31662.1 odorant receptor 8 [ <i>Cnaphalocrocis medinalis</i> ]           | 2e-125  | 95          |
| CmedOR9   | 1260        | 419      | ALT31663         | complete ORF | 5   | gb QIJ45783.1 olfactory receptor [ <i>Glyphodes pyloalis</i> ]                 | 0.0     | 73          |
| CmedOR10  | 1107        | 368      | ALT31664         | complete ORF | 5   | gb ALT31664.1 odorant receptor 10 [ <i>Cnaphalocrocis medinalis</i> ]          | 1e-128  | 100         |
| CmedOR14  | 1071        | 356      | ALT31668         | complete ORF | 5   | gb QEE82755.1 odorant receptor 37 [ <i>Conogethes pinicolicis</i> ]            | 0.0     | 75          |
| CmedOR16  | 1161        | 386      | ALT31670         | complete ORF | 6   | gb QIJ45806.1 olfactory receptor [ <i>Glyphodes pyloalis</i> ]                 | 0.0     | 73          |
| CmedOR17  | 1161        | 386      | ALT31671         | complete ORF | 6   | gb BAR43452.1 putative olfactory receptor 10 [ <i>Ostrinia furnacalis</i> ]    | 0.0     | 69          |
| CmedOR18  | 1167        | 388      | ALT31672         | complete ORF | 7   | gb ARO76436.1 odorant receptor 31 [ <i>Conogethes punctiferalis</i> ]          | 0.0     | 75          |
| CmedOR19  | 1206        | 401      | ALT31673         | complete ORF | 5   | gb ARO76432.1 odorant receptor 27 [ <i>Conogethes punctiferalis</i> ]          | 0.0     | 91          |
| CmedOR20  | 1290        | 429      | ALT31674         | complete ORF | 7   | gb ARO76440.1 odorant receptor 35 [ <i>Conogethes punctiferalis</i> ]          | 0.0     | 92          |
| CmedOR22  | 1176        | 391      | ALT31676         | complete ORF | 4   | gb QIJ45784.1 olfactory receptor [ <i>Glyphodes pyloalis</i> ]                 | 0.0     | 68          |
| CmedOR25  | 1299        | 432      | ANZ03138         | complete ORF | 7   | gb ANZ03138.1 olfactory receptor 25 [ <i>Cnaphalocrocis medinalis</i> ]        | 0.0     | 99          |
| CmedOR27  | 1308        | 435      | ANZ03140         | complete ORF | 4   | gb ANZ03140.1 olfactory receptor 27 [ <i>Cnaphalocrocis medinalis</i> ]        | 0.0     | 98          |
| CmedOR29  | 492         | 163      | ANZ03142         | complete ORF | 3   | gb ANZ03142.1 olfactory receptor 29 [ <i>Cnaphalocrocis medinalis</i> ]        | 8e-71   | 98          |
| CmedOR30  | 1140        | 379      | ANZ03143         | complete ORF | 6   | gb ANZ03143.1 olfactory receptor 30 [ <i>Cnaphalocrocis medinalis</i> ]        | 0.0     | 99          |
| CmedOR31  | 1227        | 408      | ANZ03144         | complete ORF | 3   | gb ANZ03144.1 olfactory receptor 31 [ <i>Cnaphalocrocis medinalis</i> ]        | 0.0     | 98          |
| CmedOR32  | 525         | 174      | ANZ03145         | 3' missing   | 4   | gb ANZ03145.1 olfactory receptor 32 [ <i>Cnaphalocrocis medinalis</i> ]        | 7e-122  | 100         |
| CmedOR33  | 1221        | 406      | ANZ03146         | complete ORF | 6   | gb ANZ03146.1 olfactory receptor 33 [ <i>Cnaphalocrocis medinalis</i> ]        | 0.0     | 100         |
| CmedOR35  | 1248        | 415      | ANZ03148         | complete ORF | 7   | gb ARO76445.1 odorant receptor 40 [ <i>Conogethes punctiferalis</i> ]          | 0.0     | 67          |
| CmedOR37  | 414         | 137      | ANZ03150         | complete ORF | 3   | gb ANZ03150.1 olfactory receptor 37 [ <i>Cnaphalocrocis medinalis</i> ]        | 4e-69   | 100         |
| CmedOR38  | 1200        | 399      | ANZ03151         | complete ORF | 6   | gb XP_028158571.1 odorant receptor Or2-like [ <i>Ostrinia furnacalis</i> ]     | 0.0     | 73          |
| CmedOR39  | 1251        | 416      | ANZ03152         | complete ORF | 4   | gb ANZ03152.1 olfactory receptor 39 [ <i>Cnaphalocrocis medinalis</i> ]        | 0.0     | 100         |

|           |      |     |                     |              |   |                                                                             |        |     |
|-----------|------|-----|---------------------|--------------|---|-----------------------------------------------------------------------------|--------|-----|
| CmedOR40  | 1272 | 423 | ANZ03153            | complete ORF | 5 | gb ANZ03153.1 olfactory receptor 40 [ <i>Cnaphalocrocis medinalis</i> ]     | 0.0    | 100 |
| CmedOR41  | 963  | 320 | ANZ03154            | complete ORF | 5 | gb ANZ03154.1 olfactory receptor 41 [ <i>Cnaphalocrocis medinalis</i> ]     | 1e-137 | 68  |
| CmedOR43  | 873  | 290 | ANZ03156            | complete ORF | 4 | gb ANZ03156.1 olfactory receptor 43 [ <i>Cnaphalocrocis medinalis</i> ]     | 0.0    | 85  |
| CmedOR45  | 1269 | 422 | ANZ03158            | 3' missing   | 5 | gb ANZ03158.1 olfactory receptor 45 [ <i>Cnaphalocrocis medinalis</i> ]     | 0.0    | 99  |
| CmedOR46  | 660  | 219 | ANZ03159            | complete ORF | 3 | gb ANZ03159.1 olfactory receptor 46 [ <i>Cnaphalocrocis medinalis</i> ]     | 6e-93  | 99  |
| CmedOR47  | 1200 | 399 | ANZ03160            | 3' missing   | 6 | gb QEE82743.1 odorant receptor 25 [ <i>Conogethes pinicolicalis</i> ]       | 1e-78  | 37  |
| CmedOR49  | 1296 | 431 | ANZ03162            | complete ORF | 6 | gb QIJ45802.1 olfactory receptor [ <i>Glyphodes pyloalis</i> ]              | 4e-170 | 61  |
| CmedOR51  | 1200 | 399 | ANZ03164            | complete ORF | 6 | gb QIJ45795.1 olfactory receptor [ <i>Glyphodes pyloalis</i> ]              | 0.0    | 78  |
| CmedOR54* | 1221 | 406 | novel.3382          | complete ORF | 7 | gb ANZ03139.1 olfactory receptor 26 [ <i>Cnaphalocrocis medinalis</i> ]     | 0.0    | 68  |
| CmedOR55* | 1110 | 369 | evm.TU.000497F.7    | complete ORF | 7 | gb QEE82748.1 odorant receptor 30 [ <i>Conogethes pinicolicalis</i> ]       | 0.0    | 72  |
| CmedOR56* | 1212 | 403 | evm.TU.000145F.8    | complete ORF | 6 | gb BAR43464.1 putative olfactory receptor 22 [ <i>Ostrinia furnacalis</i> ] | 0.0    | 74  |
| CmedOR57* | 1209 | 402 | novel.3252          | 3' missing   | 6 | gb ANZ03139.1 olfactory receptor 26 [ <i>Cnaphalocrocis medinalis</i> ]     | 0.0    | 69  |
| CmedOR58* | 1110 | 369 | evm.TU.000497F.6    | complete ORF | 6 | gb QIJ45814.1 olfactory receptor [ <i>Glyphodes pyloalis</i> ]              | 2e-164 | 62  |
| CmedOR59* | 1194 | 397 | evm.TU.000027F.21   | complete ORF | 6 | gb QEI46825.1 odorant receptor 9 [ <i>Galleria mellonella</i> ]             | 2e-99  | 46  |
| CmedOR60* | 1170 | 389 | evm.TU.000092F.9    | complete ORF | 5 | gb BAR43474.1 putative olfactory receptor 32 [ <i>Ostrinia furnacalis</i> ] | 1e-87  | 44  |
| CmedOR61* | 1185 | 394 | evm.TU.000027F.21.1 | 3' missing   | 5 | gb ARO76443.1 odorant receptor 38 [ <i>Conogethes punctiferalis</i> ]       | 3e-168 | 65  |
| CmedOR62* | 1179 | 392 | evm.TU.000180F.17   | 3' missing   | 4 | gb ANZ03159.1 olfactory receptor 46 [ <i>Cnaphalocrocis medinalis</i> ]     | 5e-118 | 61  |
| CmedOR63* | 795  | 264 | evm.TU.000671F.3    | complete ORF | 4 | gb ARO76437.1 odorant receptor 32 [ <i>Conogethes punctiferalis</i> ]       | 4e-78  | 46  |
| CmedOR64* | 837  | 278 | evm.TU.000247F.7    | complete ORF | 3 | gb ARO76412.1 odorant receptor 6 [ <i>Conogethes punctiferalis</i> ]        | 1e-51  | 56  |
| CmedOR65* | 477  | 158 | evm.TU.000409F.3    | complete ORF | 3 | gb QIJ45798.1 olfactory receptor [ <i>Glyphodes pyloalis</i> ]              | 5e-79  | 80  |
| CmedOR66* | 552  | 183 | evm.TU.000761F.1    | complete ORF | 2 | gb ARO76421.1 odorant receptor 15 [ <i>Conogethes punctiferalis</i> ]       | 2e-87  | 72  |
| CmedOR67* | 654  | 217 | novel.2055          | complete ORF | 2 | gb QIJ45826.1 olfactory receptor [ <i>Glyphodes pyloalis</i> ]              | 7e-64  | 50  |
| CmedOR68* | 879  | 292 | evm.TU.001076F.2    | complete ORF | 1 | gb QIJ45817.1 olfactory receptor [ <i>Glyphodes pyloalis</i> ]              | 1e-88  | 62  |
| CmedOR69* | 246  | 81  | evm.TU.000409F.4    | 3' missing   | 1 | gb ARO76419.1 odorant receptor 13 [ <i>Conogethes punctiferalis</i> ]       | 3e-38  | 84  |
| CmedOR70* | 366  | 121 | novel.4585          | complete ORF | 0 | gb AZB49441.1 olfactory receptor 27 [ <i>Heortia vitessoides</i> ]          | 1e-70  | 89  |

**Note:** The newly identified CmedORs are marked with \*.

**Table S5.** List of candidate ionotropic receptors in *C. medinalis*.

| Gene name     | Length (bp) | ORF (aa) | Accession number  | Status       | TMD | BLASTX best hit (Acc. no./Gene name/species)                                  | E-value | Identity(%) |
|---------------|-------------|----------|-------------------|--------------|-----|-------------------------------------------------------------------------------|---------|-------------|
| CmedIR8a      | 2706        | 901      | ALT31619          | complete ORF | 3   | gb ALT31619.1  ionotropic receptor 1 [ <i>Cnaphalocrocis medinalis</i> ]      | 0.0     | 99          |
| CmedIR25a     | 2313        | 770      | APY22696          | complete ORF | 2   | gb XP_050348568.1  ionotropic receptor 25a isoform X2 [ <i>Nymphalis io</i> ] | 0.0     | 80          |
| CmedIR93a     | 2625        | 874      | ALT31632          | complete ORF | 4   | gb ALT31632.1  ionotropic receptor 93a [ <i>Cnaphalocrocis medinalis</i> ]    | 0.0     | 100         |
| CmedIR21a.2   | 948         | 315      | ALT31624          | complete ORF | 3   | gb QEE82780.1  ionotropic receptor 6 [ <i>Conogethes pinicolalis</i> ]        | 0.0     | 93          |
| CmedIR40a     | 1617        | 538      | APY22697          | 5' missing   | 3   | gb APY22697.1  ionotropic receptor IR40a [ <i>Cnaphalocrocis medinalis</i> ]  | 0.0     | 100         |
| CmedIR41a     | 1620        | 539      | ALT31625          | complete ORF | 2   | gb QIJ45772.1  ionotropic receptor [ <i>Glyphodes pyloalis</i> ]              | 0.0     | 75          |
| CmedIR60a     | 1974        | 657      | APY22698          | complete ORF | 3   | gb APY22698.1  ionotropic receptor IR60a [ <i>Cnaphalocrocis medinalis</i> ]  | 0.0     | 99          |
| CmedIR64a     | 1800        | 599      | APY22699          | complete ORF | 3   | gb APY22699.1  ionotropic receptor IR64a [ <i>Cnaphalocrocis medinalis</i> ]  | 0.0     | 100         |
| CmedIR68a     | 2103        | 700      | ALT31626          | complete ORF | 4   | gb QEE82777.1  ionotropic receptor 3 [ <i>Conogethes pinicolalis</i> ]        | 0.0     | 87          |
| CmedIR75d     | 1803        | 600      | APY22700          | complete ORF | 3   | gb QEE82787.1  ionotropic receptor 75d [ <i>Conogethes pinicolalis</i> ]      | 0.0     | 80          |
| CmedIR75p.1   | 1737        | 578      | ALT31628          | complete ORF | 2   | gb ALT31628.1  ionotropic receptor 75p [ <i>Cnaphalocrocis medinalis</i> ]    | 0.0     | 78          |
| CmedIR75p.2   | 1206        | 401      | ALT31620          | complete ORF | 2   | gb QEE82789.1  ionotropic receptor 75p1 [ <i>Conogethes pinicolalis</i> ]     | 0.0     | 69          |
| CmedIR75q.1   | 804         | 267      | ALT31627          | complete ORF | 2   | gb ALT31627.1  ionotropic receptor 75 [ <i>Cnaphalocrocis medinalis</i> ]     | 2e-174  | 100         |
| CmedIR87a     | 1956        | 651      | ALT31631          | complete ORF | 3   | gb ARO76464.1  ionotropic receptor 1 [ <i>Conogethes punctiferalis</i> ]      | 0.0     | 90          |
| CmedIR1*      | 1824        | 607      | evm.TU.000705F.5  | complete ORF | 1   | gb QIJ45778.1  ionotropic receptor [ <i>Glyphodes pyloalis</i> ]              | 0.0     | 77          |
| CmedIR1.2*    | 1992        | 663      | evm.TU.000047F.47 | complete ORF | 3   | gb AOE48004.1  ionotropic receptor IR1.2 [ <i>Athetis lepigone</i> ]          | 0.0     | 57          |
| CmedIR7d.1*   | 1929        | 642      | evm.TU.000078F.13 | complete ORF | 3   | gb QHB15314.1  ionotropic receptor 7d.1 [ <i>Peridroma saucia</i> ]           | 0.0     | 47          |
| CmedIR7d.2.1* | 1308        | 435      | evm.TU.000078F.14 | complete ORF | 3   | gb KOB72673.1  Ionotropic receptor [ <i>Operophtera brumata</i> ]             | 1e-22   | 49          |
| CmedIR7d.2.2* | 1734        | 577      | evm.TU.000078F.15 | complete ORF | 4   | gb QEI46861.1  ionotropic receptor 7d [ <i>Galleria mellonella</i> ]          | 0.0     | 49          |

**Note:** The newly identified CmedIRs are marked with \*.

**Table S6.** List of candidate sensory neuron membrane proteins in *C. medinalis*.

| Gene name | Length (bp) | ORF (aa) | Accession number | Status       | TMD | BLASTX best hit (Acc. no./Gene name/species)                             | E-value | Identity(%) |
|-----------|-------------|----------|------------------|--------------|-----|--------------------------------------------------------------------------|---------|-------------|
| CmedSNMP1 | 1578        | 525      | AFG73002         | complete ORF | 2   | gb AFG73002.1  sensory neuron membrane protein 1 [ <i>C. medinalis</i> ] | 0.0     | 100         |
| CmedSNMP2 | 1563        | 520      | AFG73003         | complete ORF | 1   | gb AFG73003.1  sensory neuron membrane protein 2 [ <i>C. medinalis</i> ] | 0.0     | 99          |
